# Supplementary material
Source: PubMed Central journal article supplement (PMC6474758)

## Supplementary Information

### Effect of bicarbonate and phosphate on arsenic release from mining-impacted sediments in the Cheyenne River watershed, South Dakota, USA

Cherie L. DeVore,<sup>a</sup> Lucia Rodriguez-Freire,<sup>b</sup> Abdul Mehdi-Ali,<sup>c</sup> Carlyle Ducheneaux,<sup>d</sup> Kateryna Artyushkova,<sup>e</sup> Melissa Gonzales<sup>f</sup>, Johnnye Lewis,<sup>g</sup> Zhe Zhou,<sup>h</sup> Drew E. Latta,<sup>h</sup> ,Virgil W. Lueth and José M. Cerrato<sup>a\*</sup>

<sup>a</sup>Department of Civil Engineering, MSC01 1070, University of New Mexico, Albuquerque, New Mexico 87131, USA. E-mail: jcerrato@unm.edu; Fax: (001) (505) 277-1918; Telephone: (001) (505) 277-0870

<sup>b</sup>Department of Civil and Environmental Engineering, 266 Colton Hall, University Heights, New Jersey Institute of Technology, Newark, New Jersey 07102

<sup>c</sup>Department of Earth and Planetary Sciences, MSC03 2040, University of New Mexico, Albuquerque, New Mexico 87131, USA

<sup>d</sup>Department of Environmental and Natural Resources, Cheyenne River Sioux Tribe, Eagle Butte, South Dakota 57625

<sup>e</sup>Department of Chemical and Biological Engineering and Center for Microengineered Materials, University of New Mexico, Albuquerque, New Mexico 87131, USA

<sup>f</sup>School of Medicine, Department of Internal Medicine, University of New Mexico Health Sciences Center, MSC10 5550, Albuquerque NM 87131

<sup>g</sup>Community Environmental Health Program, College of Pharmacy, MSC09 5360, 1 University of New Mexico, Albuquerque, USA

<sup>h</sup> Department of Civil and Environmental Engineering/IIHR, The University of Iowa, 4105 Seamans Center, Iowa City, Iowa 52242, USA

<sup>i</sup>New Mexico Bureau of Geology, New Mexico Tech, Socorro, New Mexico

Electronic Supplementary Information (ESI) available: [details of

<sup>a</sup>Department of Civil Engineering, MSC01 1070, University of New Mexico, Albuquerque, New Mexico 87131, USA. E-mail: jcerrato@unm.edu; Fax: (001) (505) 277-1918; Telephone: (001) (505) 277-0870

**Table S1.** Additional Water quality data from Cheyenne River Watershed

| Site ID | Site name               | River           | Date      | Lat       | Long        | As<br>(ug L <sup>-1</sup> ) | Pb<br>(ug L <sup>-1</sup> ) | U<br>(ug L <sup>-1</sup> ) | Fe<br>(ug L <sup>-1</sup> ) | Mn<br>(ug L <sup>-1</sup> ) |
|---------|-------------------------|-----------------|-----------|-----------|-------------|-----------------------------|-----------------------------|----------------------------|-----------------------------|-----------------------------|
| CC-CR   | Cherry Creek            | Cheyenne River  | 6/6/2016  | 44.598319 | -101.498875 | 5.84                        | 17.56                       | 15.84                      | -                           | -                           |
| DR-CR   | Deal Ranch              | Cheyenne River  | 6/6/2016  | 44.579775 | -101.706836 | 5.14                        | 13.11                       | 13.56                      | -                           | -                           |
| RL-MR   | Ross Lawrence           | Moreau River    | 6/7/2016  | 45.238323 | -101.970637 | 1.47                        | 13.40                       | 14.42                      | -                           | -                           |
| TB-MR   | Thunder Butte           | Moreau River    | 6/7/2016  | 45.220150 | -101.653280 | 2.05                        | 15.67                       | 18.43                      | -                           | -                           |
| WW      | Whitewood Creek         | Whitewood Creek | 9/28/2016 | 44.371930 | -103.281480 | 62.16                       | 12.82                       | 5.14                       | 2010                        | 81.3                        |
| BF      | Belle Fourche           | Belle Fourche   | 9/28/2016 | 44.401376 | -103.291026 | 18.98                       | 9.94                        | 17.63                      | 3046                        | 93.8                        |
| BF/WW   | Belle Fourche/Whitewood | Belle Fourche   | 9/28/2016 | 44.380840 | -103.253050 | 2.25                        | 7.46                        | 15.76                      | 3081                        | 82.8                        |
| WA      | Wasta                   | Cheyenne River  | 9/28/2016 | 44.044790 | -102.235880 | 6.68                        | 17.76                       | 15.15                      | 10861                       | 220                         |
| BR      | Bridger                 | Cheyenne River  | 9/28/2016 | 44.321070 | -101.543920 | 6.10                        | 6.37                        | 6.25                       | 29.0                        | 6.18                        |

**Table S2.** HPLC/ICP-MS Conditions

| HPLC Conditions    |                                                                                                                                              |
|--------------------|----------------------------------------------------------------------------------------------------------------------------------------------|
| As Species         | As(V), As(III)                                                                                                                               |
| Mobile Phase       | 146 mg/L Ethylenediaminetetraacetic acid (EDTA) + 0.650 mL Tetrabutylammonium hydroxide (TBAoH) + 5% HPLC grade methanol (MeOH) in 1L MilliQ |
| Flow Rate          | 1 mL/min                                                                                                                                     |
| pH                 | 7 (±0.01)                                                                                                                                    |
| Pressure           | 1000-1600 psi                                                                                                                                |
| Column             | A CAPCELL PAK C18 column (250 mm × 4.6 mm, 5 µm particle size)                                                                               |
| Column Temperature | 50 degrees C                                                                                                                                 |
| Injection volume   | 10 µL                                                                                                                                        |

**Table S3.** pKa values of arsenate, arsenite and phosphoric acid

|                                                      | Pk <sub>1</sub> | Pk <sub>2</sub> | Pk <sub>3</sub> |
|------------------------------------------------------|-----------------|-----------------|-----------------|
| <b>Arsenate (H<sub>3</sub>AsO<sub>4</sub>)</b>       | 2.19            | 6.94            | 11.5            |
| <b>Arsenite (H<sub>3</sub>AsO<sub>3</sub>)</b>       | 9.2             | 14.22           | 19.22           |
| <b>Phosphoric Acid (H<sub>3</sub>PO<sub>4</sub>)</b> | 2.15            | 7.20            | 12.35           |

**Figure S1.** pH measurements during experiments with mine waste solids **A)** Whitewood Creek (WW) and **B)** Deal Ranch (DR) reacted with 0.2 mM sodium bicarbonate, 20 mM sodium bicarbonate and deionized water (DI control)

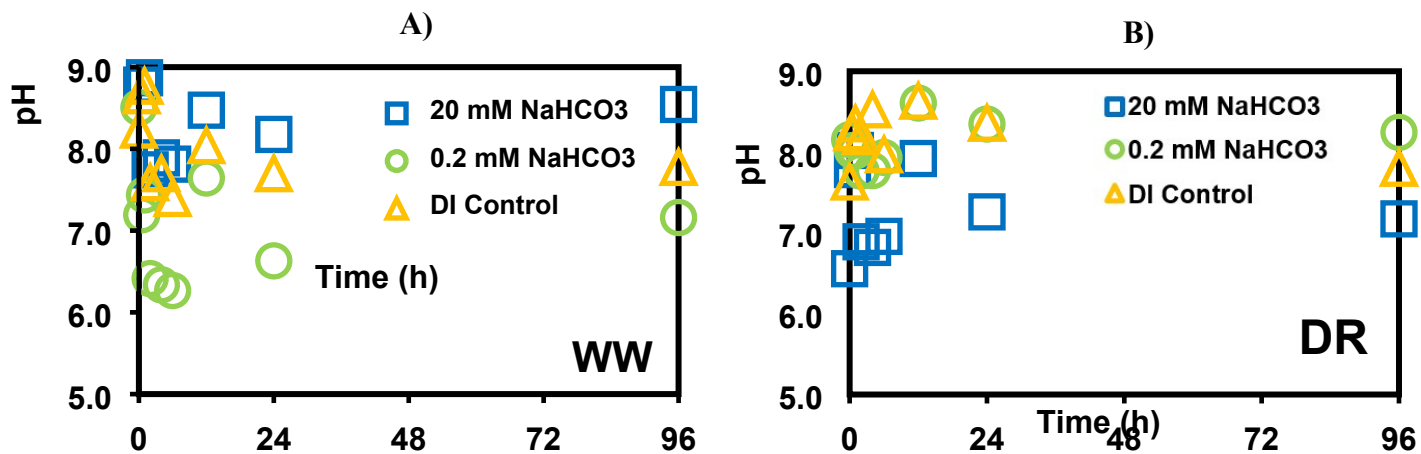

**Figure S2.** pH measurements during experiments with mine waste solids **A)** Whitewood Creek (WW) and **B)** Deal Ranch (DR) reacted with 0.1 mM sodium phosphate, 10 mM sodium phosphate and deionized water (DI control)

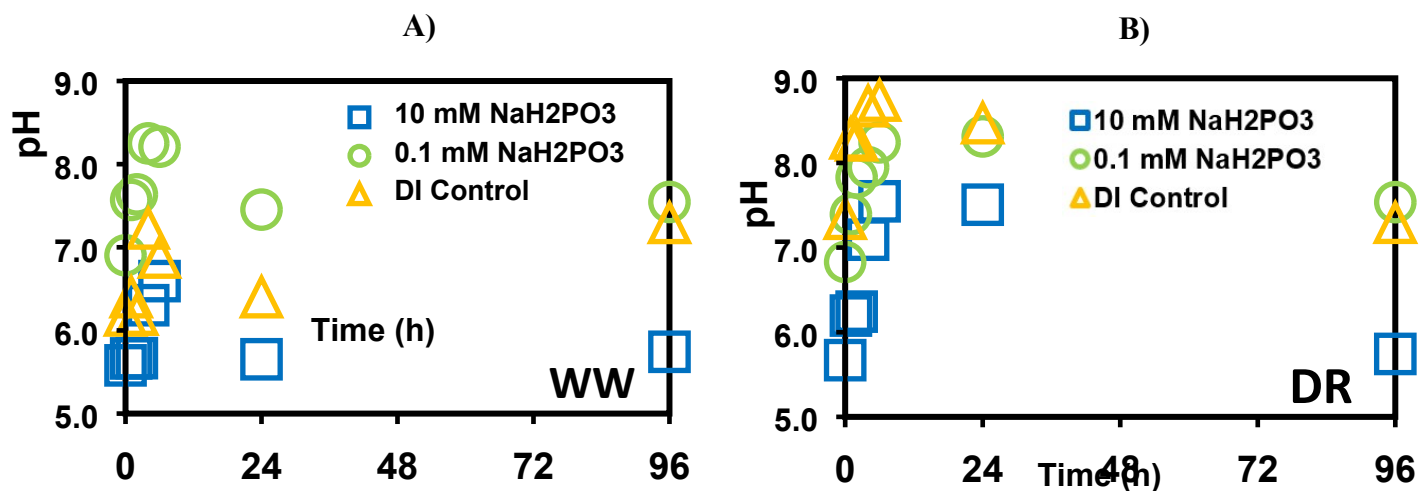

Supplement: NIHMS1019621-supplement-Supplementary_Information.pdf [file NIHMS1019621-supplement-Supplementary_Information.pdf]
